# Supplementary material for: Noble metal-free catalytic decarboxylation of oleic acid to n-heptadecane on nickel-based metal–organic frameworks (MOFs)
Source: Royal Society of Chemistry journal article supplement (doi:10.1039/c7cy00564d), 2017-01-01
Supplement: c7cy00564d1.pdf [file c7cy00564d1.pdf]

## SUPPLEMENTARY INFORMATION

### Noble metal-free catalytic decarboxylation of oleic acid to n-heptadecane on nickel-based metal-organic frameworks (MOFs)

L. Yang,<sup>a†</sup> B. W. McNichols,<sup>b†</sup> M. Davidson,<sup>c</sup> B. Schweitzer,<sup>a</sup> D.A. Gómez-Gualdrón,<sup>a</sup> B. G. Trewyn,<sup>bc</sup> A. Sellinger<sup>\*bc</sup> and M. A. Carreon<sup>\*ac</sup>

<sup>a</sup> Department of Chemical and Biological Engineering, Colorado School of Mines, Golden, CO 80401

<sup>b</sup> Department of Chemistry, Colorado School of Mines, Golden, CO 80401

<sup>c</sup> Materials Science Program, Colorado School of Mines, Golden, CO 80401

\* Corresponding authors: aselli@mines.edu; mcarreon@mines.edu

† Authors are co-first author

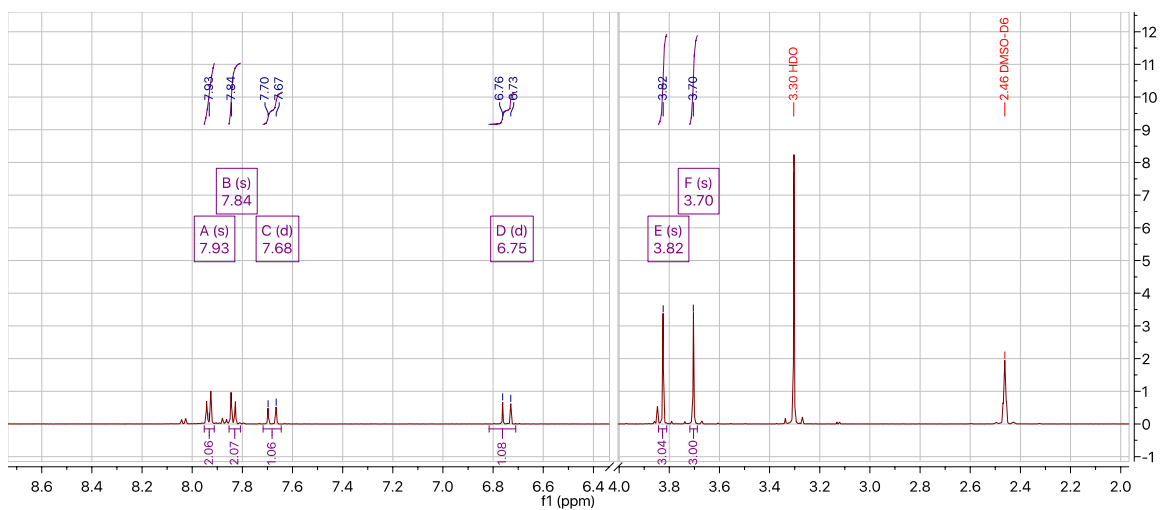

<sup>1</sup>H NMR (500 MHz, DMSO-*d*<sub>6</sub>) δ 7.93 (s, 2H), 7.84 (s, 2H), 7.68 (d, *J* = 16.0 Hz, 1H), 6.75 (d, *J* = 16.0 Hz, 1H), 3.82 (s, 3H), 3.70 (s, 3H).

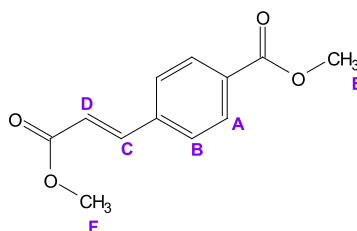

**Figure S1.** BM65 precursor - methyl (*E*)-4-(3-methoxy-3-oxoprop-1-en-1-yl)benzoate <sup>1</sup>H NMR (500 MHz, DMSO-*d*<sub>6</sub>)

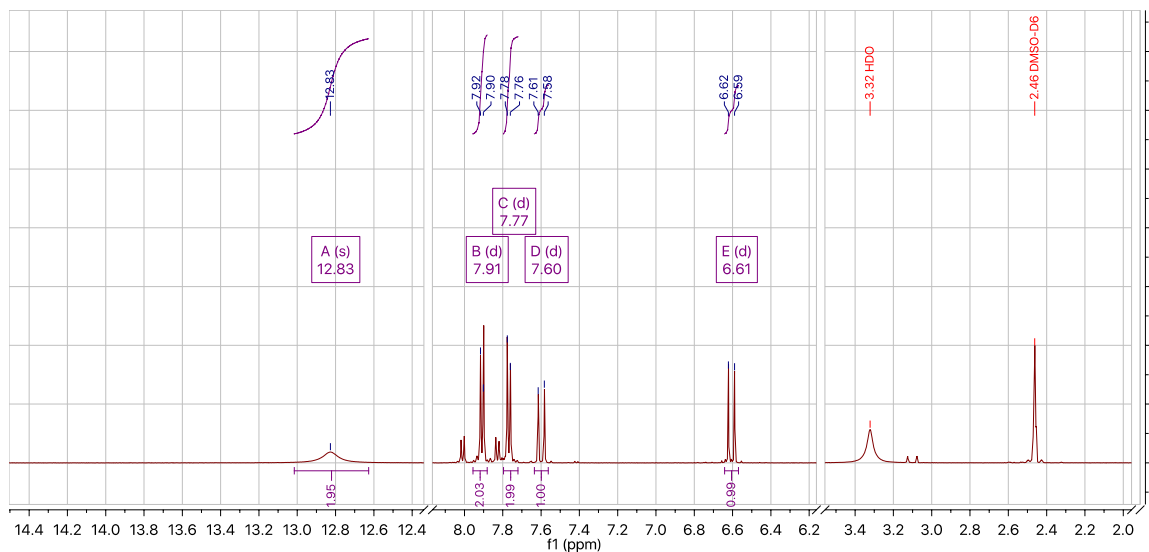

<sup>1</sup>H NMR (500 MHz, DMSO-*d*<sub>6</sub>) δ 12.83 (s, 2H), 7.91 (d, *J* = 7.6 Hz, 2H), 7.77 (d, *J* = 7.8 Hz, 2H), 7.60 (d, *J* = 16.1 Hz, 1H), 6.61 (d, *J* = 16.2 Hz, 1H).

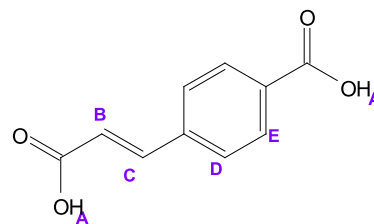

**Figure S2.** BM65 - (*E*)-4-(2-carboxyvinyl)benzoic acid <sup>1</sup>H NMR (500 MHz, DMSO-*d*<sub>6</sub>)

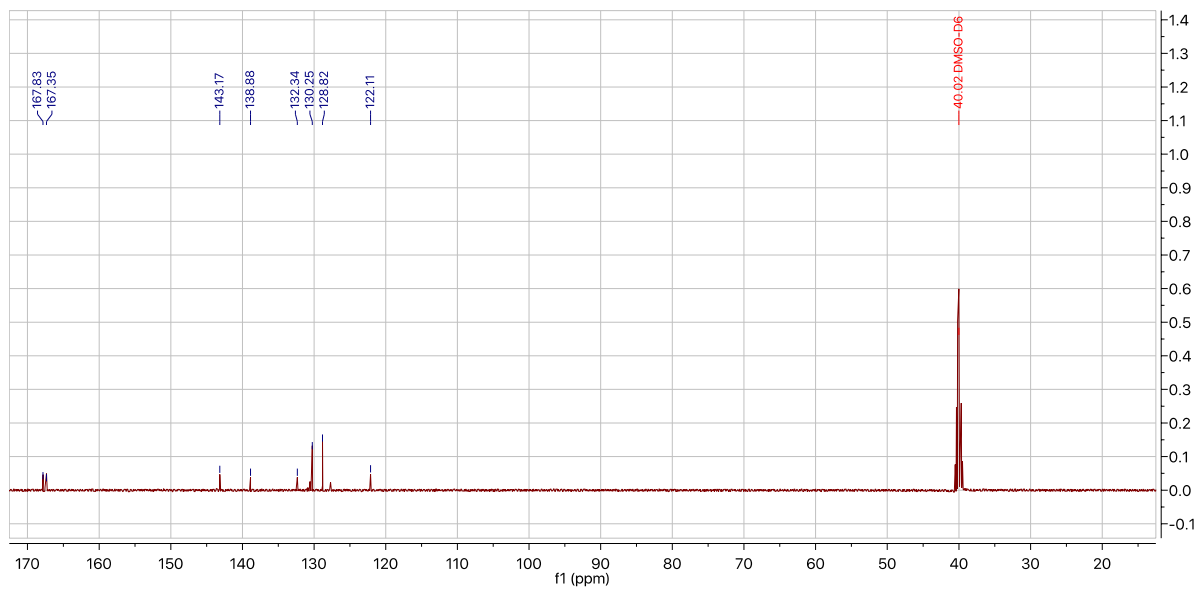

$^{13}\text{C}$  NMR (126 MHz,  $\text{DMSO-}D_6$ )  $\delta$  167.83, 167.35, 143.17, 138.88, 132.34, 130.25, 128.82, 122.11, 40.02.

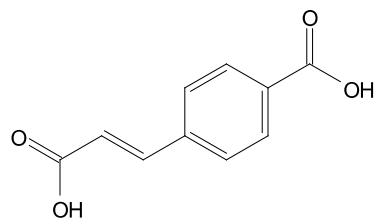

**Figure S3.** BM65 - (*E*)-4-(2-carboxyvinyl)benzoic acid  $^{13}\text{C}$  NMR (126 MHz,  $\text{DMSO-}D_6$ )

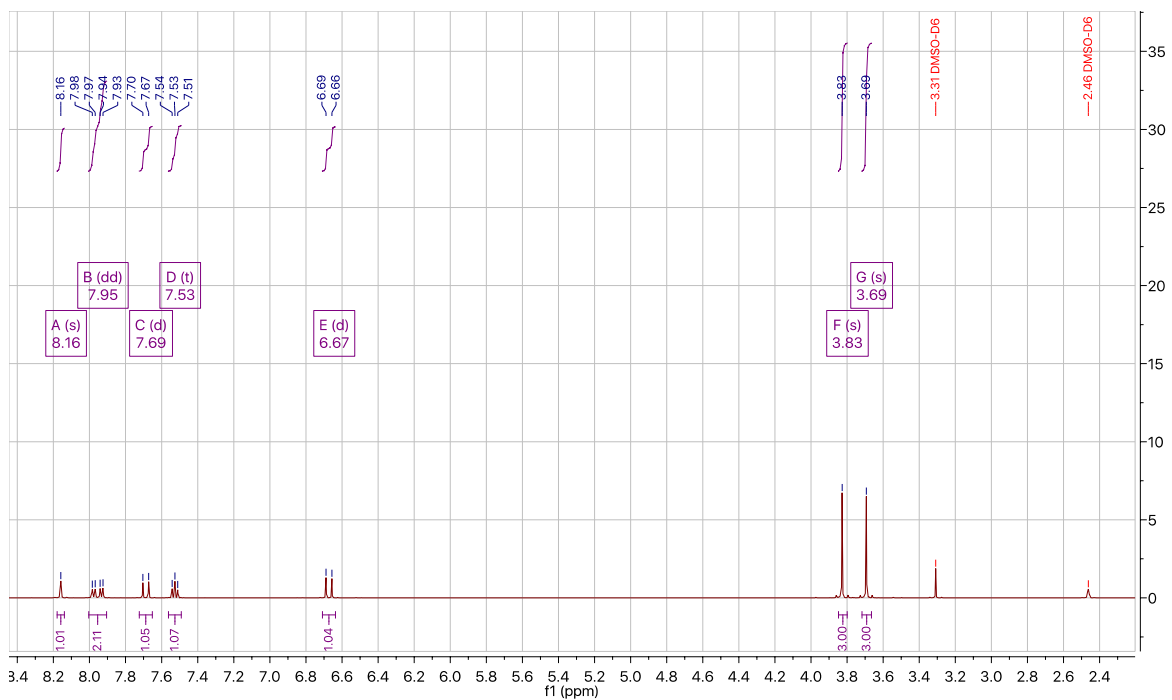

<sup>1</sup>H NMR (500 MHz, DMSO-*d*<sub>6</sub>) δ 8.16 (s, 1H), 7.95 (dd, *J* = 21.6, 7.8 Hz, 2H), 7.69 (d, *J* = 16.1 Hz, 1H), 7.53 (t, *J* = 7.8 Hz, 1H), 6.67 (d, *J* = 16.1 Hz, 1H), 3.83 (s, 3H), 3.69 (s, 3H).

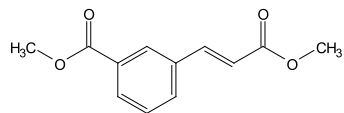

**Figure S4.** BM73 – precursor - methyl (*E*)-3-(3-methoxy-3-oxoprop-1-en-1-yl)benzoate (500 MHz, DMSO-*d*<sub>6</sub>)

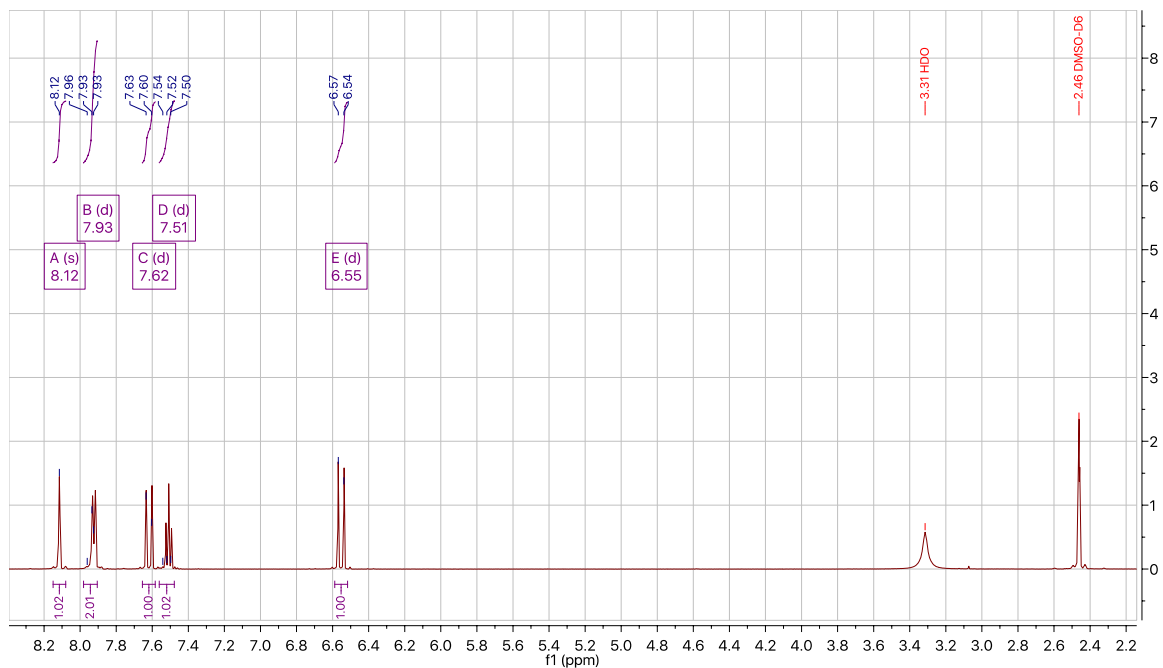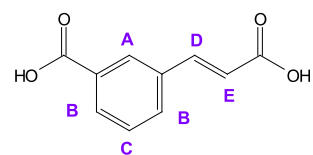

**Figure S5.** BM73 - (*E*)-3-(2-carboxyvinyl)benzoic acid  $^1\text{H NMR}$  (500 MHz,  $\text{DMSO-}d_6$ )

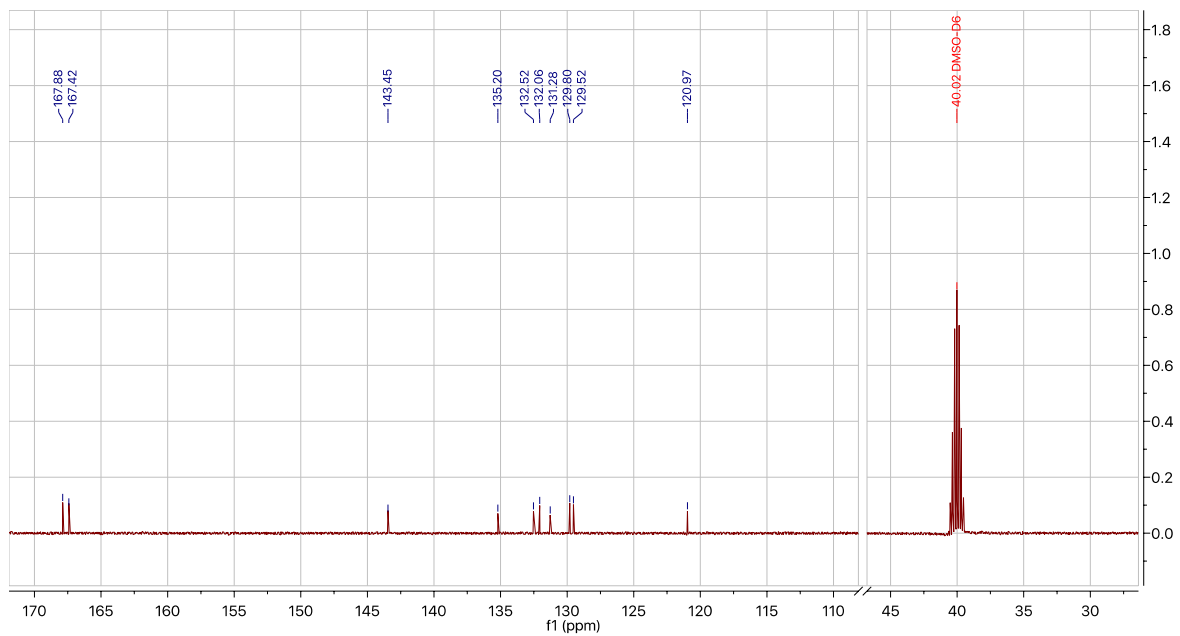

$^{13}\text{C}$  NMR (126 MHz,  $\text{DMSO-}D_6$ )  $\delta$  167.88, 167.42, 143.45, 135.20, 132.52, 132.06, 131.28, 129.80, 129.52, 120.97, 40.02.

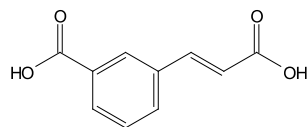

**Figure S6.** BM73 - (*E*)-3-(2-carboxyvinyl)benzoic acid  $^{13}\text{C}$  NMR (126 MHz,  $\text{DMSO-}D_6$ )

### Pxrd Analysis of Ni-BTC MOFs

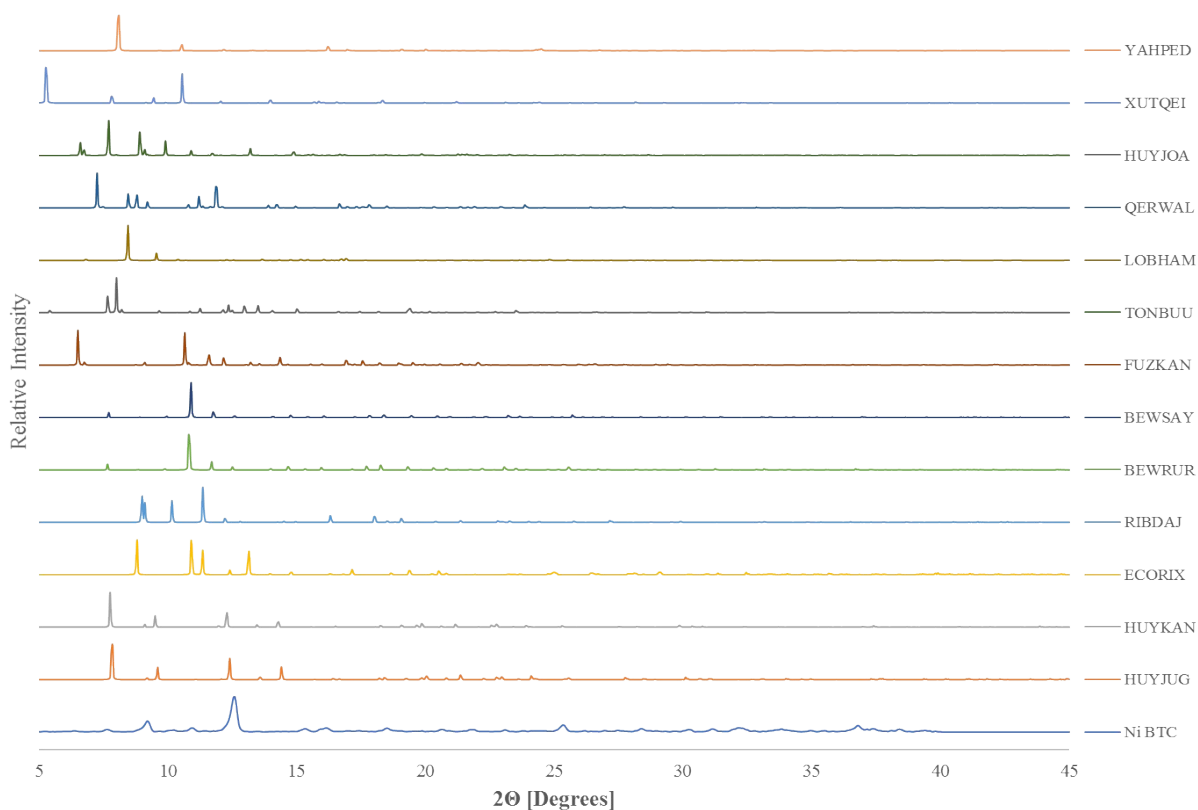

**Figure S7.** Comparison of experimentally collected PXRD pattern for our Ni-BTC with simulated patterns in all Ni-BTC variants encountered in the CoRE MOF database. In this plot, the experimental PXRD pattern underwent background stripping, Gaussian smoothing, and relative scaling using the Reflex Powder Processing Module in Materials Studio [1]. Simulated PXRD patterns for nickel MOFs from the CoRE MOF database [2] were obtained with the Reflex Materials Studio Module.

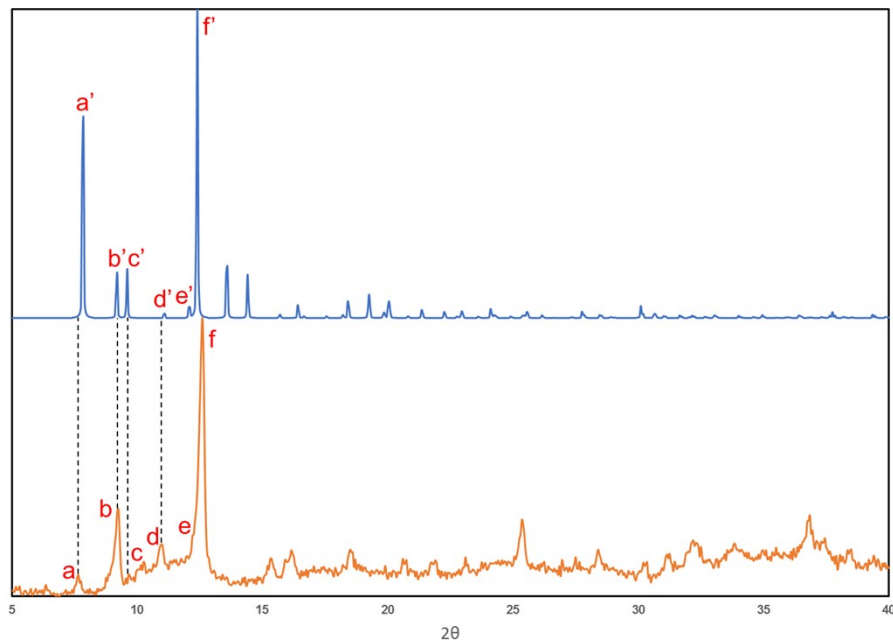

**Figure S8.** Comparison between “as-is” experimental pattern for Ni-BTC (blue) and simulated pattern for HUYJUG (orange). Coordinating solvent originally found in the reported HUYJUG structure was replaced by ethanol and water based on the solvent used for Ni-BTC synthesis in this work.

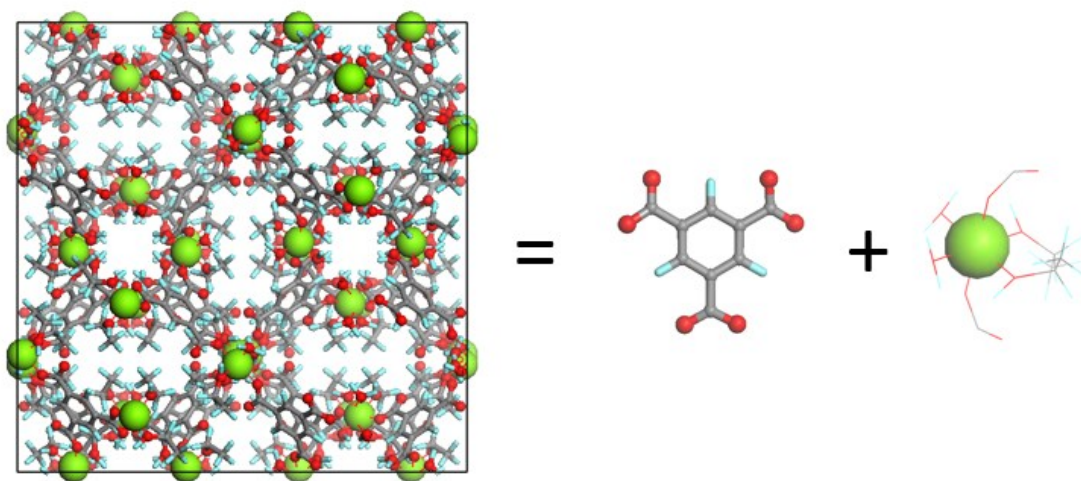

**Figure S9.** Snapshot of HUYJUG structure and its constituent building blocks: trimesic acid and six-coordinated, octahedral nickel ion. Each nickel ion is coordinated to four neutral solvents and two carboxylate groups, giving nickel a 2+ oxidation state. nickel: green, oxygen: red, carbon: gray, hydrogen: light blue. The nickel to linker ratio in HUYJUG is 1 and the experimental nickel to linker ratio in Ni-BTC is 1.4.



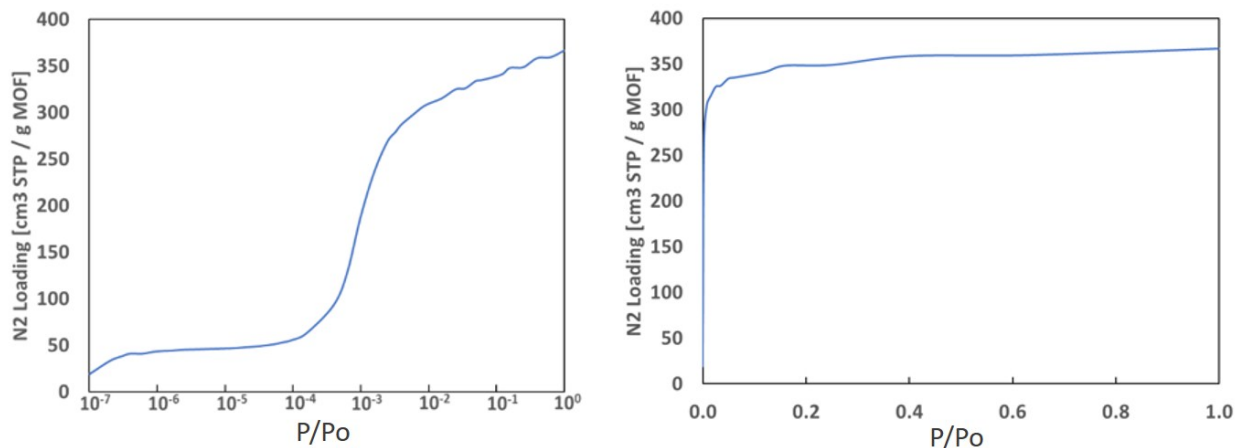

**Figure S10.** Simulated nitrogen isotherm on HUYJUG structure. Left: isotherm in semi-log scale. Right: isotherm in absolute scale. Isotherms were obtained through grand canonical Monte Carlo (GCMC) simulations using the RASPA code [3]. Intermolecular interactions were described by assigning Universal Force Field [4] parameters for MOF atoms and TraPPE force field [5] parameters for nitrogen molecules.

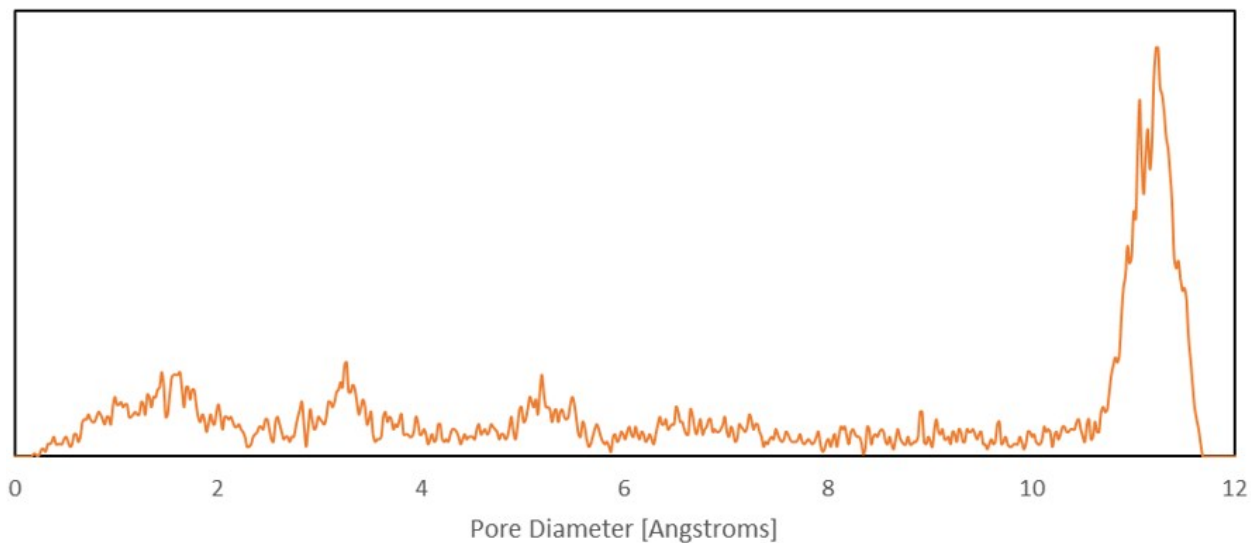

**Figure S11.** Geometrically-calculated pore size distribution of HUYJUG. Calculation follows the method outlined by Gelb and Gubbins [6].

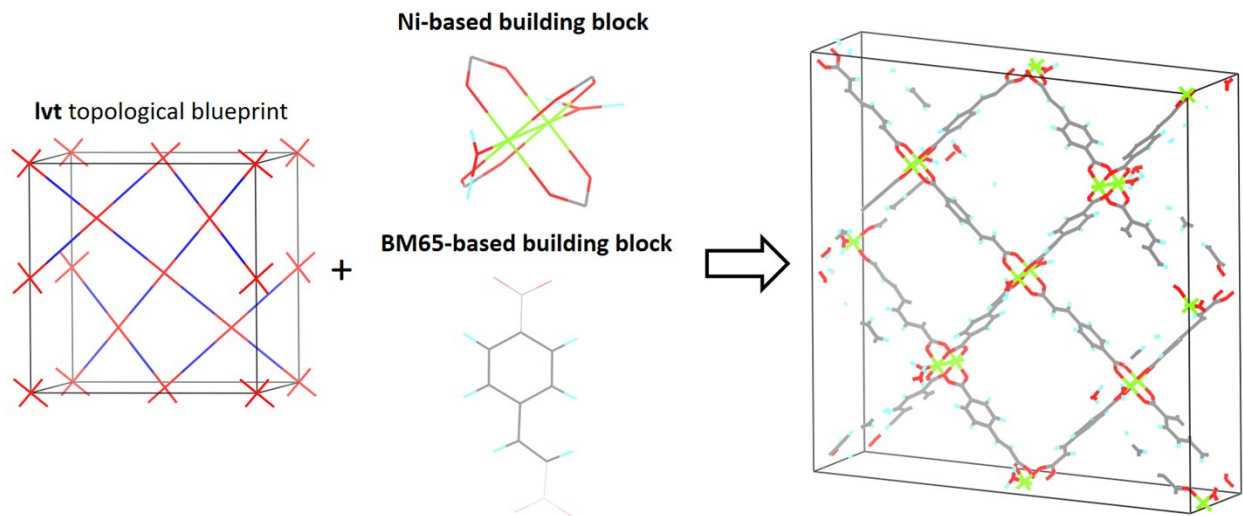

**Figure S12.** Automated computational construction of a MOF based on the BM65 linker, Ni paddlewheel and *lvt* topological blueprint. Construction was done using the topologically-based crystal constructor (ToBaCCo) code [7].

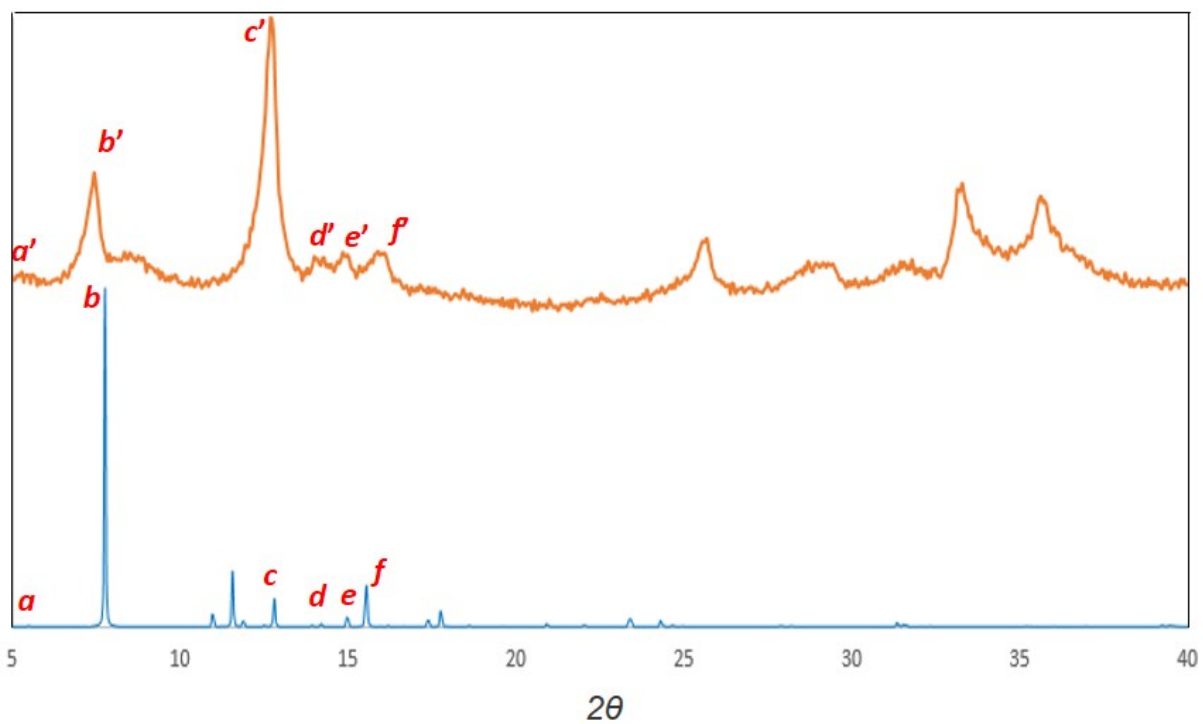

**Figure S13.** Comparison between “as-synthesized” experimental pattern for Ni-BM65 (blue) and simulated pattern for *lvt*-Ni-BM65 created by the ToBaCCo code (orange).

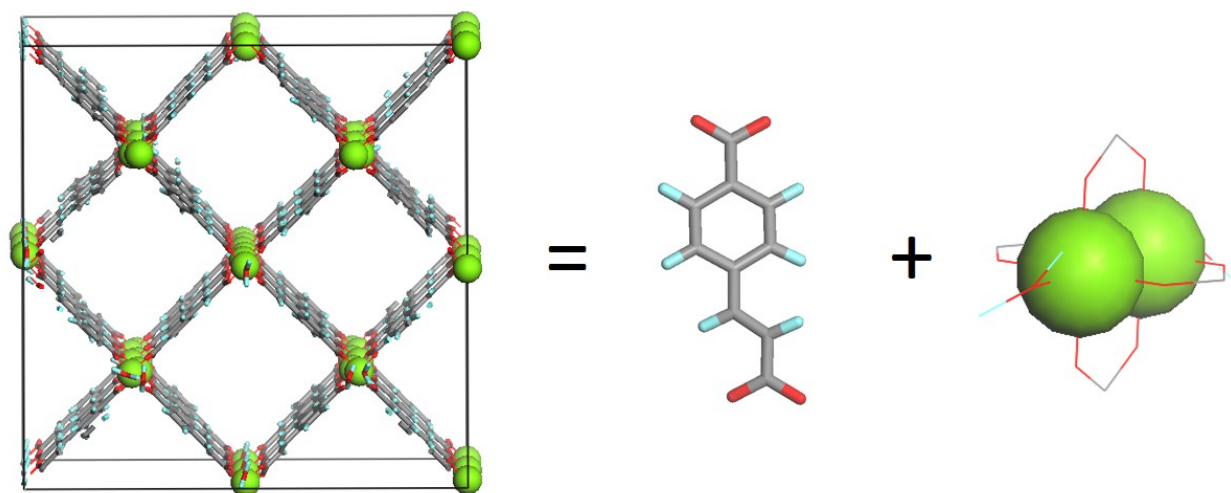

**Figure S14.** Snapshot of **lvt-Ni-BM65** structure and its constituent building blocks: trimesic acid and six-coordinated, nickel paddlewheel. The two nickel ion are coordinated to two neutral solvents and four carboxylate groups, giving the nickel ions a 2+ oxidation state. nickel: green, oxygen: red, carbon: gray, hydrogen: light blue. The linker to node ratio in **lvt-Ni-BM65** is 1 and the experimental linker to node ratio in **Ni-BM65** is 1.1.

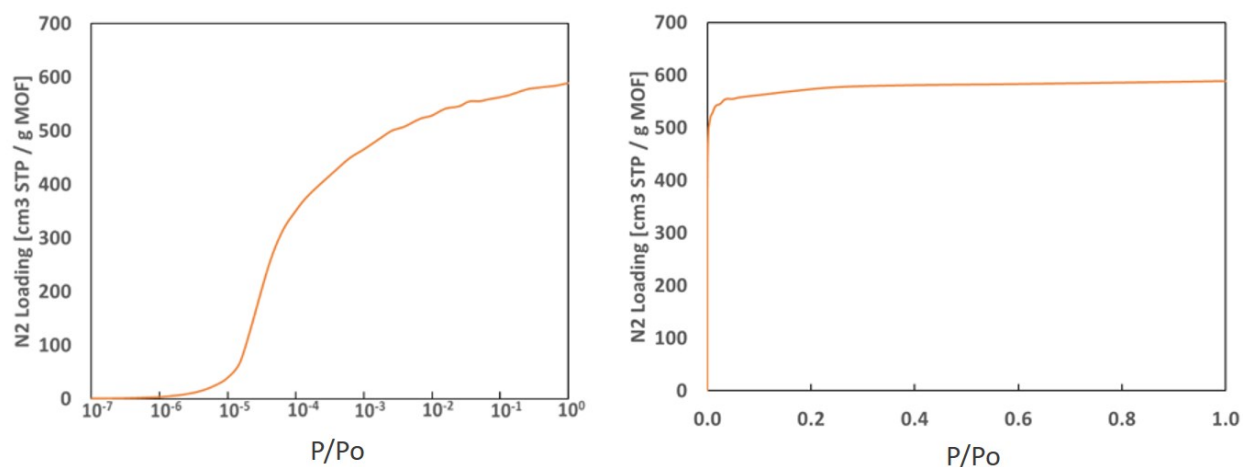

**Figure S15.** Simulated nitrogen isotherm on **lvt-Ni-BM65** structure. Left: isotherm in semi-log scale. Right: isotherm in absolute scale. Isotherms were obtained through grand canonical Monte Carlo (GCMC) simulations using the RASPA code [3]. Intermolecular interactions were described by assigning Universal Force Field [4] parameters for MOF atoms and TraPPE force field [5] parameters for nitrogen molecules.

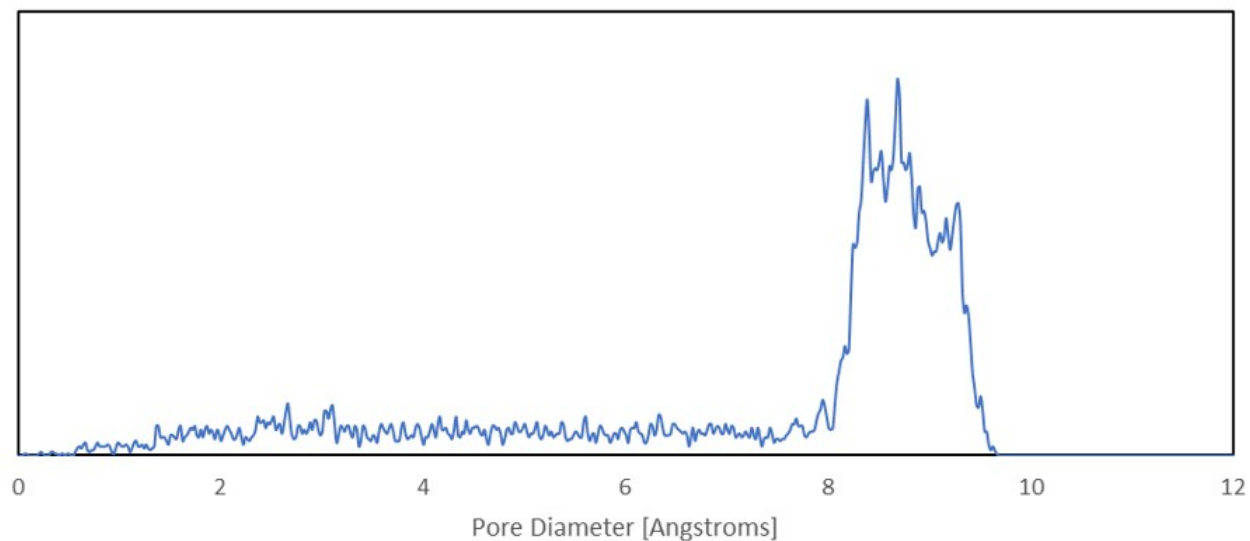

**Figure S16.** Geometrically-calculated pore size distribution of **lvt-Ni-BM65**. Calculation follows the method outlined by Gelb and Gubbins [6].

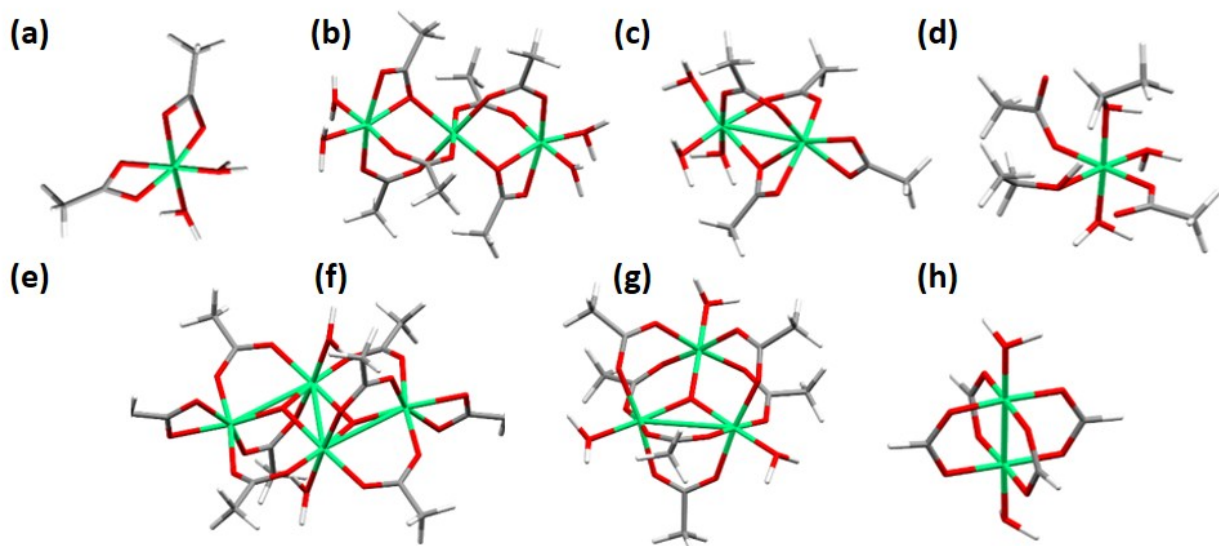

**Figure S17.** Examples of nickel nodes encountered in synthesized MOFs from the CoRE MOF database. HUYJUG is based on node (d) and **lvt-Ni-BM65** is based on node (h). DFT calculations on the latter two nodes show each node to present two unpaired electrons. DFT calculations show an electronic charge of +0.95 at the nickel atom in the node of HUYJUG and +0.56 and +0.73 in the nickel atoms in the node of **lvt-Ni-BM65**. DFT calculations were performed with the Gaussian 09 program [9] using the M06 functional [9] with the Def2TZVP basis set for nickel and the 6-31g basis set for CHO atoms. Charges were obtained according to natural bond order analysis (nbo).

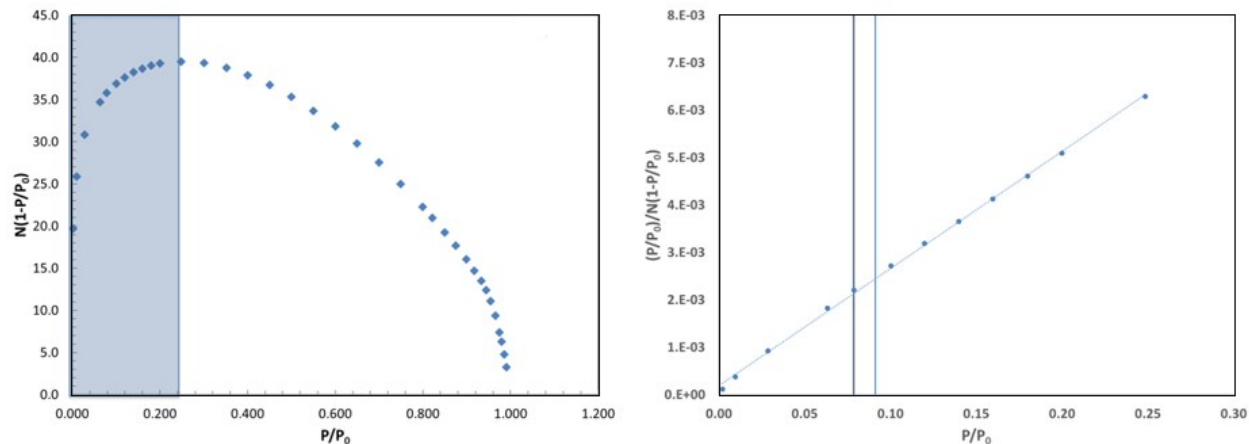

**Figure S18.** BET area calculation from measured nitrogen isotherm in Ni-BM 65. Left: Plot illustrating the pressure range selection for the BET area calculation to fulfill first and second BET consistency criterion. Right: BET area calculation in selected pressure range. Vertical lines indicate the pressure  $P_m$  corresponding to monolayer loading estimated from BET theory (to fulfill the third BET consistency criterion, it should fall within pressure range used for the linear regression) and the pressure equal to  $1/(C^{1/2} + 1)$  (to fulfill the fourth BET consistency criterion both vertical lines should be within 20% of each other).  $N_m = 40 \text{ cm}^3(\text{STP})/\text{g}$ ,  $C = 137.7$ ,  $P_m = 0.079$ . BET area =  $175 \text{ m}^2/\text{g}$ .

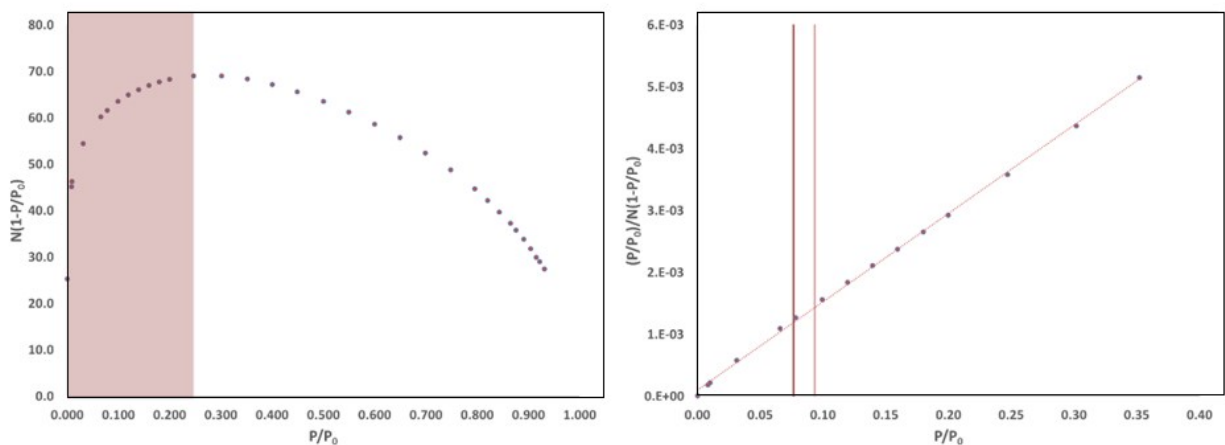

**Figure S19.** BET area calculation from measured nitrogen isotherm in Ni-BM 73. Left: Plot illustrating the pressure range selection for the BET area calculation to fulfill first and second BET consistency criterion. Right: BET area calculation in selected pressure range. Vertical lines indicate the pressure  $P_m$  corresponding to monolayer loading estimated from BET theory (to fulfill the third BET consistency criterion, it should fall within pressure range used for the linear regression) and the pressure equal to  $1/(C^{1/2} + 1)$  (to fulfill the fourth BET consistency criterion both vertical lines should be within 20% of each other).  $N_m = 70 \text{ cm}^3(\text{STP})/\text{g}$ ,  $C = 145.4$ ,  $P_m = 0.077$ . BET area =  $301 \text{ m}^2/\text{g}$ .

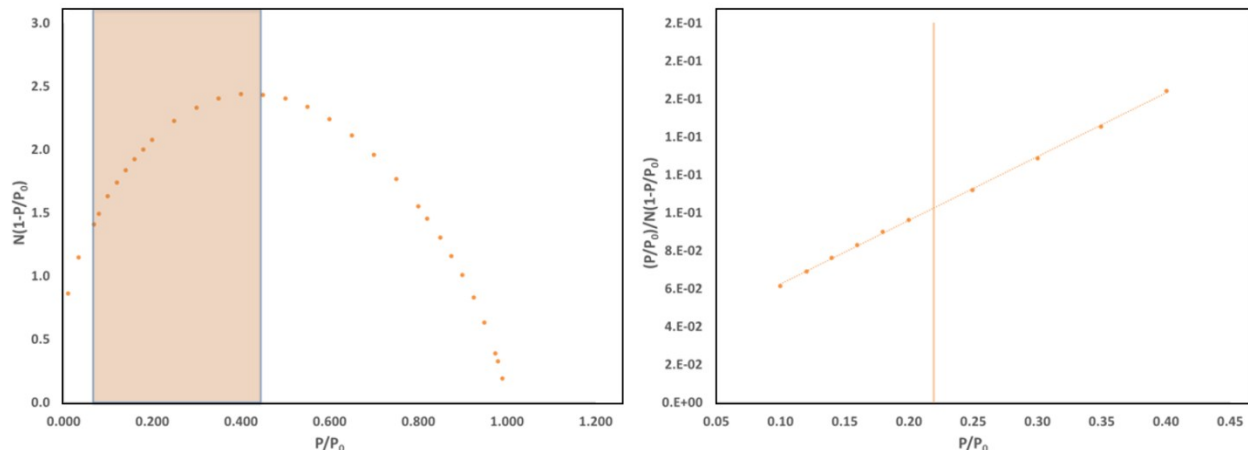

**Figure S20.** BET area calculation from measured nitrogen isotherm in Ni-BTC. Left: Plot illustrating the pressure range selection for the BET area calculation to fulfill first and second BET consistency criterion. Right: BET area calculation in selected pressure range. Vertical lines indicate the pressure  $P_m$  corresponding to monolayer loading estimated from BET theory (to fulfill the third BET consistency criterion, it should fall within pressure range used for the linear regression) and the pressure equal to  $1/(C^{1/2} + 1)$  (to fulfill the fourth BET consistency criterion both vertical lines should be within 20% of each other).  $N_m = 3 \text{ cm}^3(\text{STP})/\text{g}$ ,  $C = 12.7$ ,  $P_m/P_0 = 1.50 \times 10^{-3}$ . BET area =  $12 \text{ m}^2/\text{g}$ .

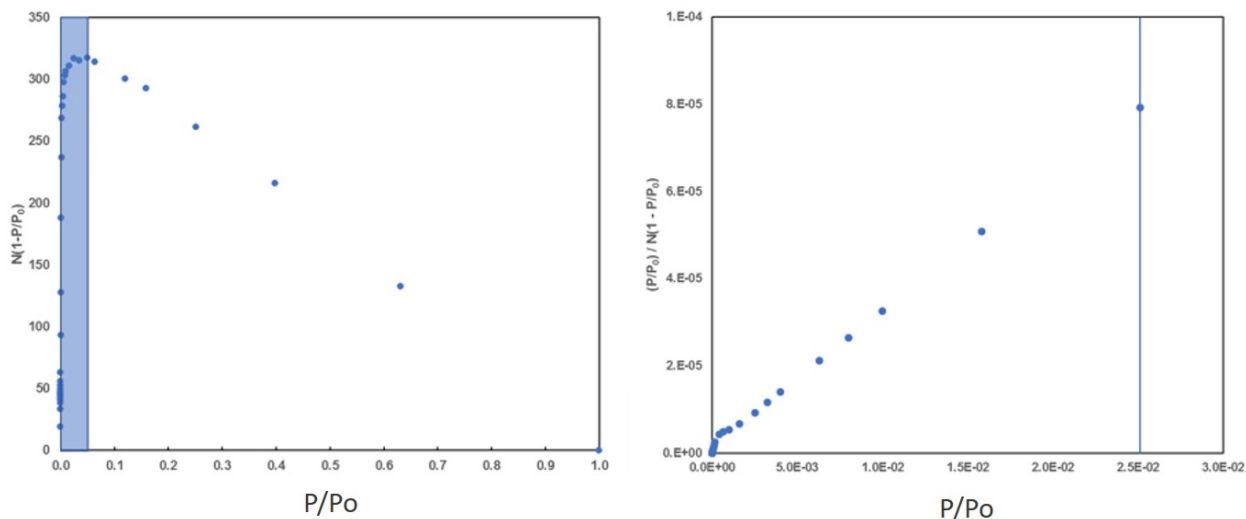

**Figure S21.** BET area calculation from simulated nitrogen isotherm in HUYJUG. Left: Plot illustrating the pressure range selection for the BET area calculation to fulfill first and second BET consistency criterion. Right: BET area calculation in selected pressure range. Vertical lines indicate the pressure  $P_m$  corresponding to monolayer loading estimated from BET theory (to fulfill the third BET consistency criterion, it should fall within pressure range used for the linear regression) and the pressure equal to  $1/(C^{1/2} + 1)$  (to fulfill the fourth BET consistency criterion both vertical lines should be within 20% of each other).  $N_m = 317.2 \text{ cm}^3(\text{STP})/\text{g}$ ,  $C = 3569.6$ ,  $P_m/P_0 = 0.01646$ . BET area =  $1381.4 \text{ m}^2/\text{g}$ .

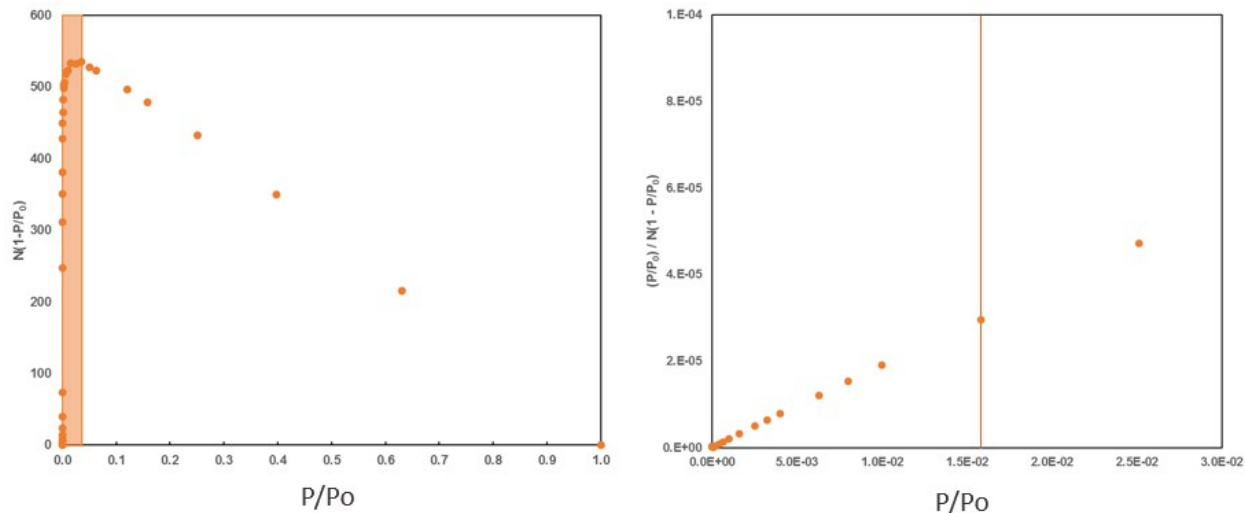

**Figure S22.** BET area calculation from simulated nitrogen isotherm in *lvt*-Ni-BM65. Left: Plot illustrating the pressure range selection for the BET area calculation to fulfill first and second BET consistency criterion. Right: BET area calculation in selected pressure range. Vertical lines indicate the pressure  $P_m$  corresponding to monolayer loading estimated from BET theory (to fulfill the third BET consistency criterion, it should fall within pressure range used for the linear regression) and the pressure equal to  $1/(C^{1/2} + 1)$  (to fulfill the fourth BET consistency criterion both vertical lines should be within 20% of each other).  $N_m = 533.2 \text{ cm}^3(\text{STP})/\text{g}$ ,  $C = 7430.8$ ,  $P_m/P_0 = 0.01147$ . BET area =  $2322.0 \text{ m}^2/\text{g}$ .

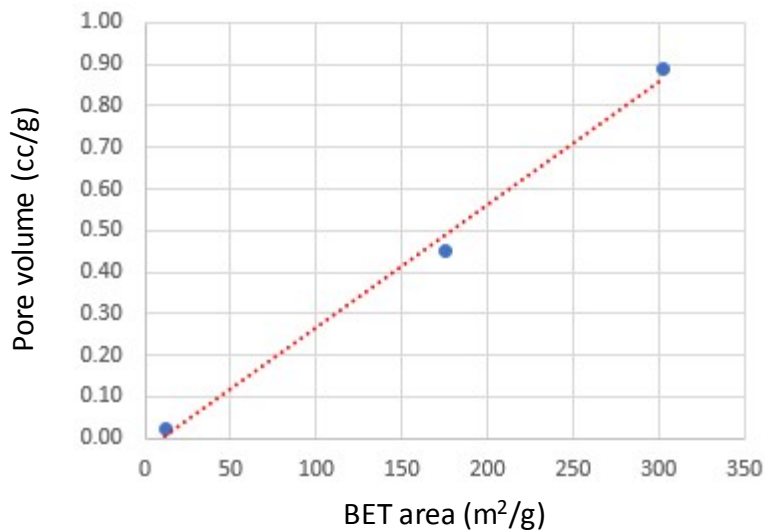

**Figure S23.** Correlation between BET area and pore volume for Ni-BM 65, Ni-BM-73 and Ni-BTC.

**Table S1.** List of linkers found in Ni MOFs encountered in the CoRE MOF Database [2]. The Cambridge Structural Database name of the corresponding MOF is listed at the top. Many entries include a 2D representation of the nodes the linkers are bound to within the MOFs, and how the linkers are bound to them. This list was obtained through our search for possible structures corresponding to the ones synthesized in this work. Images from Marvin Js [10] and Cambridge Structural Database [11]

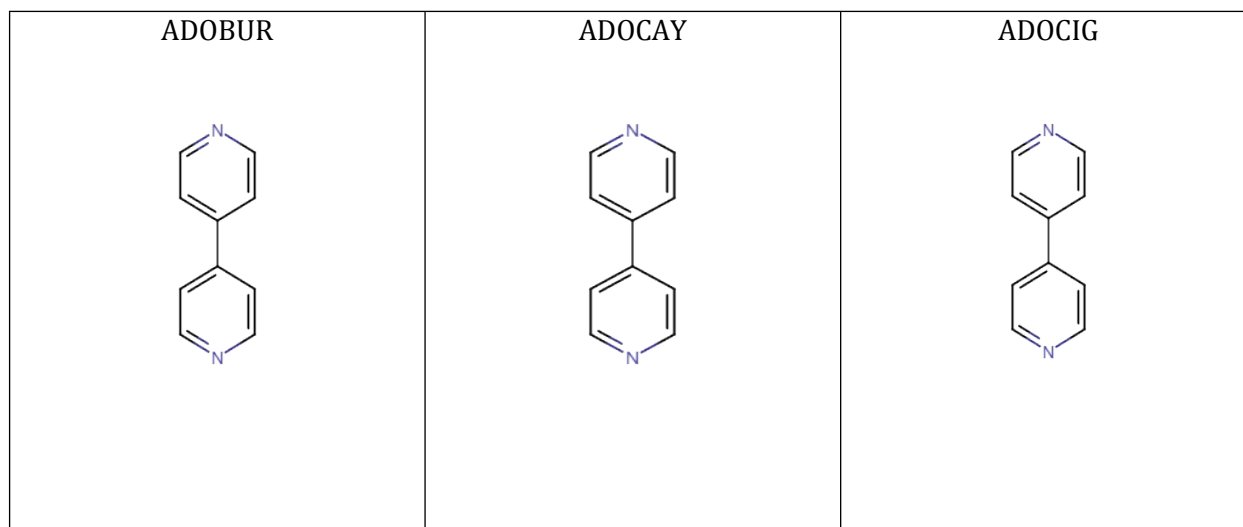



|                                                                                                                                      |                                                                                                                                      |                                                                                                                                        |
|--------------------------------------------------------------------------------------------------------------------------------------|--------------------------------------------------------------------------------------------------------------------------------------|----------------------------------------------------------------------------------------------------------------------------------------|
| <p style="text-align: center;"><b>AFEDIA</b></p> 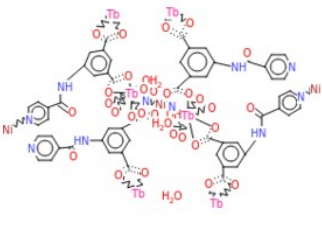   | <p style="text-align: center;"><b>AGUWUV</b></p>    | <p style="text-align: center;"><b>ALIXOJ</b></p>    |
| <p style="text-align: center;"><b>ALURIJ</b></p>   | <p style="text-align: center;"><b>AVELUJ</b></p>   | <p style="text-align: center;"><b>AVEMAQ</b></p>   |
| <p style="text-align: center;"><b>AXUBOL</b></p>  | <p style="text-align: center;"><b>BAKGIF</b></p>  | <p style="text-align: center;"><b>BEPROF</b></p>  |

|                                                                                                                                      |                                                                                                                                      |                                                                                                                                        |
|--------------------------------------------------------------------------------------------------------------------------------------|--------------------------------------------------------------------------------------------------------------------------------------|----------------------------------------------------------------------------------------------------------------------------------------|
| <p style="text-align: center;"><b>BEWRUR</b></p> 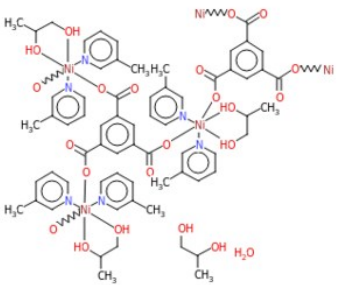   | <p style="text-align: center;"><b>BEWSAY</b></p>    | <p style="text-align: center;"><b>BEXPAX</b></p>    |
| <p style="text-align: center;"><b>BEXRUT</b></p>   | <p style="text-align: center;"><b>BIBXOB</b></p>   | <p style="text-align: center;"><b>BIBXUH</b></p>   |
| <p style="text-align: center;"><b>BINDAF</b></p>  | <p style="text-align: center;"><b>BONMEX</b></p>  | <p style="text-align: center;"><b>BORBEQ</b></p>  |

|                                                                                                                                |                                                                                                                            |                                                                                                                              |
|--------------------------------------------------------------------------------------------------------------------------------|----------------------------------------------------------------------------------------------------------------------------|------------------------------------------------------------------------------------------------------------------------------|
| <p style="text-align: center;"><b>BUCROH</b></p> <p style="text-align: center;"><math>O^-NO_2</math>    <math>Et-OH</math></p> | <p style="text-align: center;"><b>CAWZUX</b></p> <p style="text-align: center;"><math>H_2O</math></p>                      | <p style="text-align: center;"><b>CAXXEG</b></p> <p style="text-align: center;"><math>Et-OH</math><br/><math>H_2O</math></p> |
| <p style="text-align: center;"><b>CEHWIX</b></p> <p style="text-align: center;"><math>H_2O</math>    <math>HO-CH_3</math></p>  | <p style="text-align: center;"><b>CEHWOD</b></p> <p style="text-align: center;"><math>H_2O</math>    <math>H_2O</math></p> | <p style="text-align: center;"><b>CETGOY</b></p> <p style="text-align: center;"><math>H_2O</math></p>                        |
| <p style="text-align: center;"><b>CIPRID</b></p> <p style="text-align: center;"><math>H_2O</math>    <math>OH^-</math></p>     | <p style="text-align: center;"><b>DAPXEZ</b></p> <p style="text-align: center;"><math>Et-OH</math></p>                     | <p style="text-align: center;"><b>DAWBOU</b></p> <p style="text-align: center;"><math>H_2O</math></p>                        |

|                                                                                                                                      |                                                                                                                                      |                                                                                                                                          |
|--------------------------------------------------------------------------------------------------------------------------------------|--------------------------------------------------------------------------------------------------------------------------------------|------------------------------------------------------------------------------------------------------------------------------------------|
| <p style="text-align: center;"><b>DAWCAH</b></p> 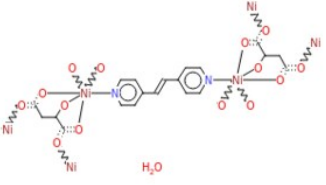   | <p style="text-align: center;"><b>DEYDOA</b></p>    | <p style="text-align: center;"><b>DEYJIC</b></p>      |
| <p style="text-align: center;"><b>DIBPIP</b></p>   | <p style="text-align: center;"><b>DIBWUH</b></p>   | <p style="text-align: center;"><b>DODHUA</b></p>     |
| <p style="text-align: center;"><b>DOYLIM</b></p>  | <p style="text-align: center;"><b>DUXKEN</b></p>  | <p style="text-align: center;"><b>DUXZIG01</b></p>  |

|                                                                                                                                       |                                                                                                                                      |                                                                                                                                        |
|---------------------------------------------------------------------------------------------------------------------------------------|--------------------------------------------------------------------------------------------------------------------------------------|----------------------------------------------------------------------------------------------------------------------------------------|
| <p style="text-align: center;"><b>EBELUU</b></p> 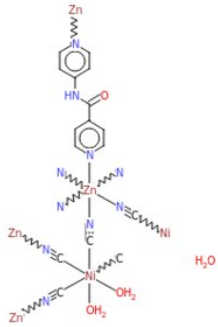    | <p style="text-align: center;"><b>EBEMEF</b></p>    | <p style="text-align: center;"><b>ECEZAO</b></p>    |
| <p style="text-align: center;"><b>ECEZAO01</b></p>  | <p style="text-align: center;"><b>ECORIX</b></p>   | <p style="text-align: center;"><b>EGATIQ</b></p>   |
| <p style="text-align: center;"><b>ENAFAB</b></p>   | <p style="text-align: center;"><b>ENUCOG</b></p>  | <p style="text-align: center;"><b>EXOTOB</b></p>  |

|                                                                                                                                      |                                                                                                                                      |                                                                                                                                          |
|--------------------------------------------------------------------------------------------------------------------------------------|--------------------------------------------------------------------------------------------------------------------------------------|------------------------------------------------------------------------------------------------------------------------------------------|
| <p style="text-align: center;"><b>EZOFEF</b></p> 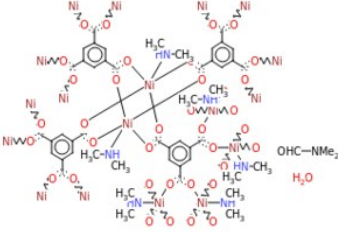   | <p style="text-align: center;"><b>FAKGOP</b></p>    | <p style="text-align: center;"><b>FEVDIV</b></p>      |
| <p style="text-align: center;"><b>FEWTUY</b></p>   | <p style="text-align: center;"><b>FIFPAM</b></p>   | <p style="text-align: center;"><b>FIFPAM01</b></p>   |
| <p style="text-align: center;"><b>FIHRIZ</b></p>  | <p style="text-align: center;"><b>FISPIH</b></p>  | <p style="text-align: center;"><b>FOHSAW01</b></p>  |

|                                                                                                                                      |                                                                                                                                      |                                                                                                                                         |
|--------------------------------------------------------------------------------------------------------------------------------------|--------------------------------------------------------------------------------------------------------------------------------------|-----------------------------------------------------------------------------------------------------------------------------------------|
| <p style="text-align: center;"><b>FUZKAN</b></p> 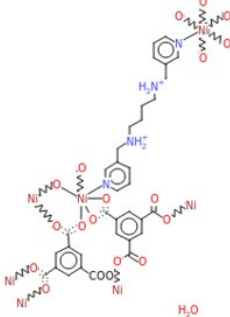   | <p style="text-align: center;"><b>GAGXAP</b></p>    | <p style="text-align: center;"><b>GAXQIH</b></p>     |
| <p style="text-align: center;"><b>GEDDEA</b></p>   | <p style="text-align: center;"><b>GELVID</b></p>   | <p style="text-align: center;"><b>GELVID01</b></p>  |
| <p style="text-align: center;"><b>GESFAN</b></p>  | <p style="text-align: center;"><b>GIFKAH</b></p>  | <p style="text-align: center;"><b>GIFKIP</b></p>   |

|                                                                                                                                      |                                                                                                                                      |                                                                                                                                        |
|--------------------------------------------------------------------------------------------------------------------------------------|--------------------------------------------------------------------------------------------------------------------------------------|----------------------------------------------------------------------------------------------------------------------------------------|
| <p style="text-align: center;"><b>GIHPAQ</b></p> 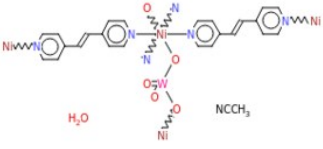   | <p style="text-align: center;"><b>GUSCIH</b></p>    | <p style="text-align: center;"><b>HAFTOZ</b></p>    |
| <p style="text-align: center;"><b>HEDTER</b></p>   | <p style="text-align: center;"><b>HIFTUM</b></p>    | <p style="text-align: center;"><b>HIHFOV</b></p>   |
| <p style="text-align: center;"><b>HIYYEU</b></p>  | <p style="text-align: center;"><b>HOGSIG</b></p>  | <p style="text-align: center;"><b>HURGUX</b></p>  |



HURGUX01

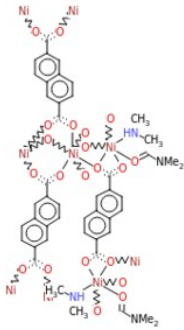

HUYJOA

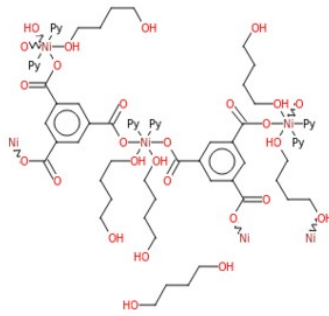

HUYJUG

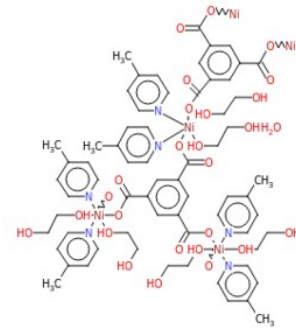

HUYKAN

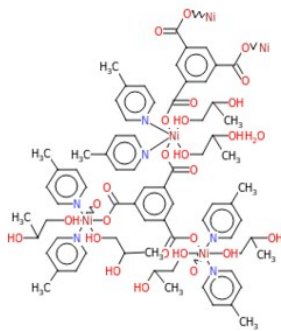

HUYKUH

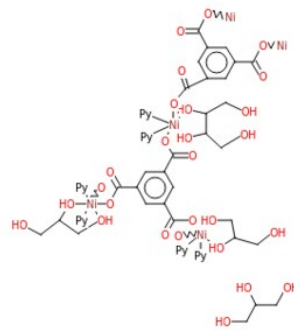

IBITUK

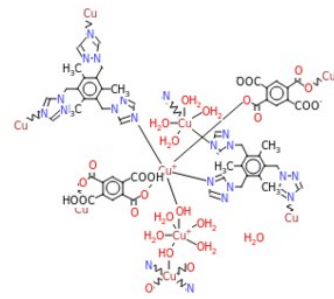

ICAROV

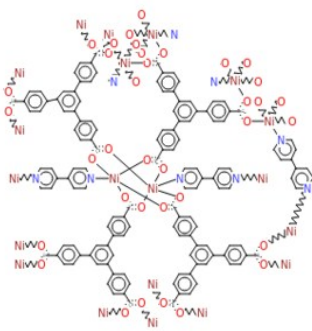

ICIVAS

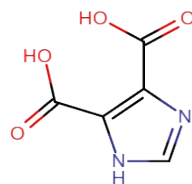

INEBOT

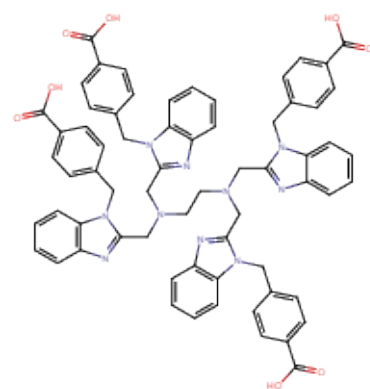

|                                                                                                                                       |                                                                                                                                      |                                                                                                                                        |
|---------------------------------------------------------------------------------------------------------------------------------------|--------------------------------------------------------------------------------------------------------------------------------------|----------------------------------------------------------------------------------------------------------------------------------------|
| <p style="text-align: center;"><b>INEBOT01</b></p> 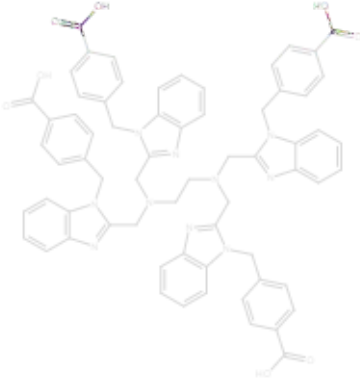  | <p style="text-align: center;"><b>INESIE</b></p>    | <p style="text-align: center;"><b>INIRAY</b></p>    |
| <p style="text-align: center;"><b>INIRAY01</b></p>  | <p style="text-align: center;"><b>ISENUQ</b></p>   | <p style="text-align: center;"><b>IYUREA</b></p>   |
| <p style="text-align: center;"><b>JEMNAR</b></p>   | <p style="text-align: center;"><b>KALFIO</b></p>  | <p style="text-align: center;"><b>KALFOU</b></p>  |

|                                                                                                                                      |                                                                                                                                      |                                                                                                                                        |
|--------------------------------------------------------------------------------------------------------------------------------------|--------------------------------------------------------------------------------------------------------------------------------------|----------------------------------------------------------------------------------------------------------------------------------------|
| <p style="text-align: center;"><b>KALGAH</b></p> 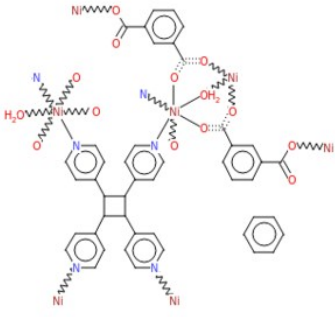   | <p style="text-align: center;"><b>KALGEL</b></p>    | <p style="text-align: center;"><b>KARLIA</b></p>    |
| <p style="text-align: center;"><b>KARLUM</b></p>   | <p style="text-align: center;"><b>KARMAT</b></p>   | <p style="text-align: center;"><b>KARNAU</b></p>   |
| <p style="text-align: center;"><b>KAVLID</b></p>  | <p style="text-align: center;"><b>KEXFAU</b></p>  | <p style="text-align: center;"><b>KEYDEZ</b></p>  |

|                                                                                                                                      |                                                                                                                                      |                                                                                                                                        |
|--------------------------------------------------------------------------------------------------------------------------------------|--------------------------------------------------------------------------------------------------------------------------------------|----------------------------------------------------------------------------------------------------------------------------------------|
| <p style="text-align: center;"><b>KIFXOO</b></p> 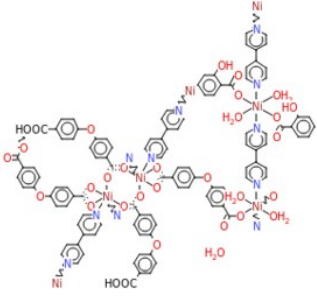   | <p style="text-align: center;"><b>KILFUI</b></p>    | <p style="text-align: center;"><b>KILFUI01</b></p>  |
| <p style="text-align: center;"><b>KINQAB</b></p>   | <p style="text-align: center;"><b>KIYMIP</b></p>   | <p style="text-align: center;"><b>KOLWEO</b></p>   |
| <p style="text-align: center;"><b>KONYOB</b></p>  | <p style="text-align: center;"><b>KUGZIW</b></p>  | <p style="text-align: center;"><b>KUJNEJ</b></p>  |

|                                                                                                                                      |                                                                                                                                        |                                                                                                                                        |
|--------------------------------------------------------------------------------------------------------------------------------------|----------------------------------------------------------------------------------------------------------------------------------------|----------------------------------------------------------------------------------------------------------------------------------------|
| <p style="text-align: center;"><b>LASQON</b></p> 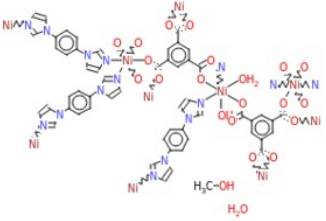   | <p style="text-align: center;"><b>LECQEQ</b></p>      | <p style="text-align: center;"><b>LEJRIC</b></p>    |
| <p style="text-align: center;"><b>LOBHAM</b></p>   | <p style="text-align: center;"><b>LODPUQ</b></p>     | <p style="text-align: center;"><b>LOFCUF</b></p>   |
| <p style="text-align: center;"><b>LOJNAA</b></p>  | <p style="text-align: center;"><b>LUFQUZ02</b></p>  | <p style="text-align: center;"><b>LULHUW</b></p>  |

|                                                                                                                                                                                                                                           |                                                                                                                                                                                               |                                                                                                                                                                                                            |
|-------------------------------------------------------------------------------------------------------------------------------------------------------------------------------------------------------------------------------------------|-----------------------------------------------------------------------------------------------------------------------------------------------------------------------------------------------|------------------------------------------------------------------------------------------------------------------------------------------------------------------------------------------------------------|
| <p style="text-align: center;"><b>MARPOL</b></p> 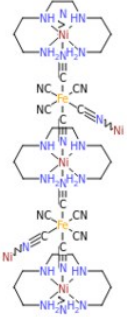 <p style="text-align: right;"><math>H_2O</math></p>                                                    | <p style="text-align: center;"><b>MEGBAD</b></p>                                                             | <p style="text-align: center;"><b>MIFPUO</b></p>  <p style="text-align: right;"><math>Cl^-</math> <math>H_2O</math></p> |
| <p style="text-align: center;"><b>MIJMAU</b></p>  <p style="text-align: right;"><math>H_2O</math></p>                                                   | <p style="text-align: center;"><b>MUGFOK</b></p>  <p style="text-align: right;"><math>H_2O</math></p>       | <p style="text-align: center;"><b>NEDWIE</b></p>  <p style="text-align: right;"><math>OHC-NMe_2</math></p>             |
| <p style="text-align: center;"><b>NERNON</b></p>  <p style="text-align: right;"><math>O-NO_2</math><br/><math>H_3C-OH</math><br/><math>H_2O</math></p> | <p style="text-align: center;"><b>NESTAI</b></p>  <p style="text-align: right;"><math>Me_2N-CHO</math></p> | <p style="text-align: center;"><b>NOKLIJ</b></p>  <p style="text-align: right;"><math>C=O</math></p>                  |

|                                                                                                                                      |                                                                                                                                      |                                                                                                                                        |
|--------------------------------------------------------------------------------------------------------------------------------------|--------------------------------------------------------------------------------------------------------------------------------------|----------------------------------------------------------------------------------------------------------------------------------------|
| <p style="text-align: center;"><b>NUJCIE</b></p> 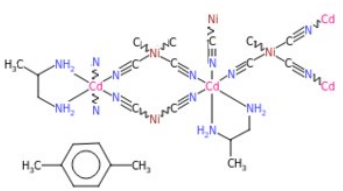   | <p style="text-align: center;"><b>NULMAJ</b></p>    | <p style="text-align: center;"><b>NUVYIN</b></p>    |
| <p style="text-align: center;"><b>NUVYOT</b></p>   | <p style="text-align: center;"><b>OCAQOY</b></p>   | <p style="text-align: center;"><b>ODONEB</b></p>   |
| <p style="text-align: center;"><b>OGECOY</b></p>  | <p style="text-align: center;"><b>OLOKEF</b></p>  | <p style="text-align: center;"><b>OVIZID</b></p>  |

|                                                                                                                                      |                                                                                                                                      |                                                                                                                                        |
|--------------------------------------------------------------------------------------------------------------------------------------|--------------------------------------------------------------------------------------------------------------------------------------|----------------------------------------------------------------------------------------------------------------------------------------|
| <p style="text-align: center;"><b>OYUJUO</b></p> 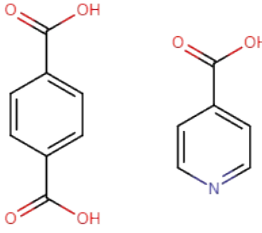   | <p style="text-align: center;"><b>PAPRUU</b></p>    | <p style="text-align: center;"><b>PAQVOU</b></p>    |
| <p style="text-align: center;"><b>PARMIG</b></p>   | <p style="text-align: center;"><b>PEBXIF</b></p>   | <p style="text-align: center;"><b>PEPKUR</b></p>   |
| <p style="text-align: center;"><b>PESTUD</b></p>  | <p style="text-align: center;"><b>PEVXAQ</b></p>  | <p style="text-align: center;"><b>PEWXUL</b></p>  |



|                                                                                                                                                                                                                                                       |                                                                                                                                                                                                                                                     |                                                                                                                                                                                                                                                       |
|-------------------------------------------------------------------------------------------------------------------------------------------------------------------------------------------------------------------------------------------------------|-----------------------------------------------------------------------------------------------------------------------------------------------------------------------------------------------------------------------------------------------------|-------------------------------------------------------------------------------------------------------------------------------------------------------------------------------------------------------------------------------------------------------|
| <p style="text-align: center;"><b>PEWXUL01</b></p> 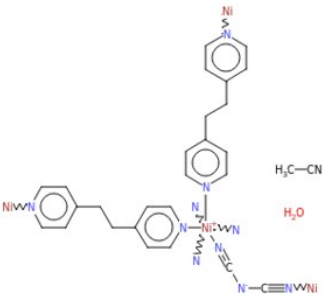 <p style="text-align: center;"><math>\text{H}_3\text{C}-\text{CN}</math><br/><math>\text{H}_2\text{O}</math></p> | <p style="text-align: center;"><b>PEYSIW</b></p>  <p style="text-align: center;"><math>\text{H}_3\text{C}-\text{CN}</math><br/><math>\text{H}_2\text{O}</math></p> | <p style="text-align: center;"><b>POBYAH</b></p>  <p style="text-align: center;"><math>\text{H}_3\text{C}-\text{CN}</math><br/><math>\text{H}_2\text{O}</math></p> |
| <p style="text-align: center;"><b>POKGEK</b></p>  <p style="text-align: center;"><math>\text{H}_2\text{O}</math></p>                                                | <p style="text-align: center;"><b>POQXAV</b></p>  <p style="text-align: center;"><math>\text{H}_2\text{O}</math><br/><math>\text{O}-\text{SO}_3</math></p>        | <p style="text-align: center;"><b>PUWCOZ</b></p>  <p style="text-align: center;"><math>\text{H}_2\text{O}</math></p>                                              |
| <p style="text-align: center;"><b>QAVYUJ</b></p>  <p style="text-align: center;"><math>\text{H}_2\text{O}</math></p>                                               | <p style="text-align: center;"><b>QAVZAQ</b></p>  <p style="text-align: center;"><math>\text{H}_2\text{O}</math></p>                                             | <p style="text-align: center;"><b>QERWAL</b></p>  <p style="text-align: center;"><math>\text{Et}-\text{OH}</math><br/><math>\text{H}_2\text{O}</math></p>        |

|                                                                                                                                      |                                                                                                                                      |                                                                                                                                        |
|--------------------------------------------------------------------------------------------------------------------------------------|--------------------------------------------------------------------------------------------------------------------------------------|----------------------------------------------------------------------------------------------------------------------------------------|
| <p style="text-align: center;"><b>QOSXAY</b></p> 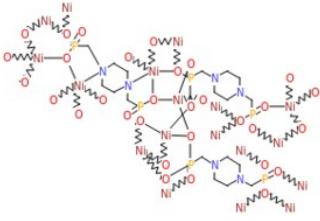   | <p style="text-align: center;"><b>QOVDEL</b></p>    | <p style="text-align: center;"><b>QUQGEP</b></p>    |
| <p style="text-align: center;"><b>RABHAZ</b></p>   | <p style="text-align: center;"><b>RABHIH</b></p>   | <p style="text-align: center;"><b>RESSAK</b></p>   |
| <p style="text-align: center;"><b>RIBDAJ</b></p>  | <p style="text-align: center;"><b>ROGLOP</b></p>  | <p style="text-align: center;"><b>ROGSAI</b></p>  |

|                                                                                                                                      |                                                                                                                                      |                                                                                                                                        |
|--------------------------------------------------------------------------------------------------------------------------------------|--------------------------------------------------------------------------------------------------------------------------------------|----------------------------------------------------------------------------------------------------------------------------------------|
| <p style="text-align: center;"><b>SEJBAL</b></p> 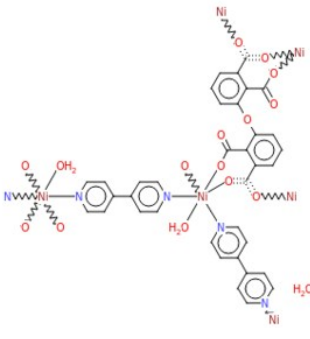   | <p style="text-align: center;"><b>SEQSIS</b></p>    | <p style="text-align: center;"><b>SISFEH</b></p>    |
| <p style="text-align: center;"><b>SIZPAT</b></p>   | <p style="text-align: center;"><b>SIZPEX</b></p>   | <p style="text-align: center;"><b>SOBZOY</b></p>   |
| <p style="text-align: center;"><b>SOVHAM</b></p>  | <p style="text-align: center;"><b>TADYEE</b></p>  | <p style="text-align: center;"><b>TADYII</b></p>  |

|                                                                                                                                                                                                                                            |                                                                                                                                                                                                                                  |                                                                                                                                                                                                  |
|--------------------------------------------------------------------------------------------------------------------------------------------------------------------------------------------------------------------------------------------|----------------------------------------------------------------------------------------------------------------------------------------------------------------------------------------------------------------------------------|--------------------------------------------------------------------------------------------------------------------------------------------------------------------------------------------------|
| <p style="text-align: center;"><b>TARVUD</b></p> 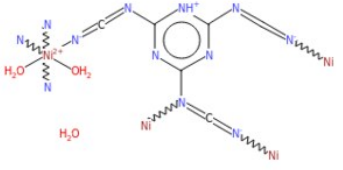                                                                                                         | <p style="text-align: center;"><b>TISGUY</b></p>                                                                                                | <p style="text-align: center;"><b>TOHPUC</b></p>                                                              |
| <p style="text-align: center;"><b>TONBUU</b></p>  <p style="text-align: right;"><math>\text{Me}_2\text{N}^+</math><br/><math>\text{OHC-NMe}_2</math></p> | <p style="text-align: center;"><b>UDIHOE</b></p>  <p style="text-align: right;"><math>\text{OH}^-</math><br/><math>\text{OHC-NMe}_2</math></p> | <p style="text-align: center;"><b>UFATEA01</b></p>                                                           |
| <p style="text-align: center;"><b>UGAQEY</b></p>  <p style="text-align: left;"><math>\text{H}_2\text{O}</math></p>                                      | <p style="text-align: center;"><b>UJARAZ</b></p>  <p style="text-align: right;"><math>\text{H}_2\text{O}</math></p>                           | <p style="text-align: center;"><b>UQUHAQ</b></p>  <p style="text-align: right;"><math>\text{CHO}</math></p> |

|                                                                                                                                      |                                                                                                                                      |                                                                                                                                        |
|--------------------------------------------------------------------------------------------------------------------------------------|--------------------------------------------------------------------------------------------------------------------------------------|----------------------------------------------------------------------------------------------------------------------------------------|
| <p style="text-align: center;"><b>UTEWOG</b></p> 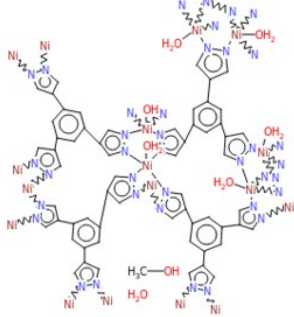   | <p style="text-align: center;"><b>UZAFAD</b></p>    | <p style="text-align: center;"><b>VECWUX</b></p>    |
| <p style="text-align: center;"><b>VEGXUC</b></p>   | <p style="text-align: center;"><b>VEHNED</b></p>   | <p style="text-align: center;"><b>VEQBID</b></p>   |
| <p style="text-align: center;"><b>VETTAR</b></p>  | <p style="text-align: center;"><b>VEXTUO</b></p>  | <p style="text-align: center;"><b>VICLAW</b></p>  |

|                                                                                                                                      |                                                                                                                                      |                                                                                                                                        |
|--------------------------------------------------------------------------------------------------------------------------------------|--------------------------------------------------------------------------------------------------------------------------------------|----------------------------------------------------------------------------------------------------------------------------------------|
| <p style="text-align: center;"><b>VIRPOC</b></p> 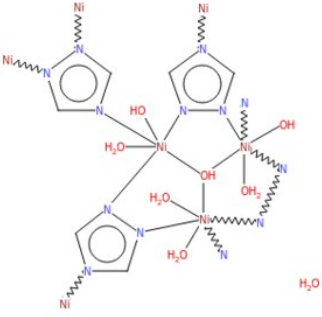   | <p style="text-align: center;"><b>VOCNOQ</b></p>    | <p style="text-align: center;"><b>VUSQIQ</b></p>    |
| <p style="text-align: center;"><b>WARJAC</b></p>   | <p style="text-align: center;"><b>WEFXEM</b></p>   | <p style="text-align: center;"><b>WEFXIQ</b></p>   |
| <p style="text-align: center;"><b>WEHPOP</b></p>  | <p style="text-align: center;"><b>WOWHEV</b></p>  | <p style="text-align: center;"><b>WUZRUE</b></p>  |

|                                                                                                                                      |                                                                                                                                      |                                                                                                                                        |
|--------------------------------------------------------------------------------------------------------------------------------------|--------------------------------------------------------------------------------------------------------------------------------------|----------------------------------------------------------------------------------------------------------------------------------------|
| <p style="text-align: center;"><b>XADFEP</b></p> 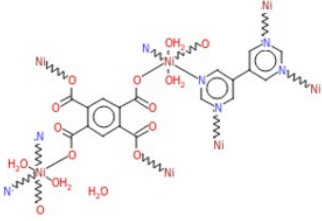   | <p style="text-align: center;"><b>XAMLUS</b></p>    | <p style="text-align: center;"><b>XAPYAO</b></p>    |
| <p style="text-align: center;"><b>XEJXAN</b></p>   | <p style="text-align: center;"><b>XEJXER</b></p>   | <p style="text-align: center;"><b>XOBWIX</b></p>   |
| <p style="text-align: center;"><b>XOBXIW</b></p>  | <p style="text-align: center;"><b>XOJCUV</b></p>  | <p style="text-align: center;"><b>XOPVII</b></p>  |

|                                                                                                                                                                                          |                                                                                                                                                                                          |                                                                                                                                                                                                                   |
|------------------------------------------------------------------------------------------------------------------------------------------------------------------------------------------|------------------------------------------------------------------------------------------------------------------------------------------------------------------------------------------|-------------------------------------------------------------------------------------------------------------------------------------------------------------------------------------------------------------------|
| <p style="text-align: center;"><b>XUJCUB</b></p> 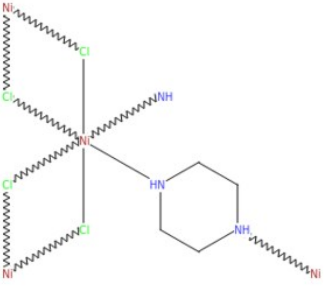                                                       | <p style="text-align: center;"><b>XUTQEI</b></p>                                                        | <p style="text-align: center;"><b>YAHPED</b></p>                                                                               |
| <p style="text-align: center;"><b>YAPMAF</b></p>  <p style="text-align: right;"><math>H_2O</math></p>  | <p style="text-align: center;"><b>YARBUQ</b></p>                                                       | <p style="text-align: center;"><b>YEQRIV</b></p>                                                                              |
| <p style="text-align: center;"><b>YERJEL</b></p>  <p style="text-align: right;"><math>H_2O</math></p> | <p style="text-align: center;"><b>YEZKIZ</b></p>  <p style="text-align: right;"><math>H_2O</math></p> | <p style="text-align: center;"><b>YIZWIN</b></p>  <p style="text-align: right;"><math>H_3C-COMe</math> <math>H_2O</math></p> |



ZURQOS

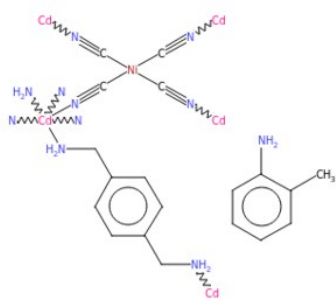

ZURROT

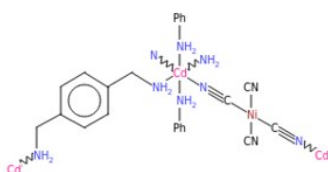

## REFERENCES

1. "Material Studio"; Accelrys Software Inc.: San Diego, CA 92121, USA, 2001- 2011.
2. Y. G. Chung, J. Camp, M. Haranczyk, B. J. Sikora, W. Bury, V. Krungleviciute, T. Yildirim, O. K. Farha, D. S. Sholl, and R. Q. Snurr, "Computation-ready, experimental metal-organic frameworks: A tool to enable high-throughput screening of nanoporous crystals," *Chem. Mater.*, vol. 26, no. 21, pp. 6185–6192, 2014.
3. Dubbeldam, D.; Calero, S.; Ellis, D. E.; Snurr, R. Q. RASPA: Molecular Simulation Software for Adsorption and Diffusion in Flexible Nanoporous Materials *Mol. Simul.* **2016**, 42, 81– 101
4. Rappe, A. K.; Casewit, C. J.; Colwell, K. S.; Goddard, W. A.; Skiff, W. M. Uff, a Full Periodic Table Force Field for Molecular Mechanics and Molecular Dynamics Simulations *J. Am. Chem. Soc.* **1992**, 114, 10024– 10035
5. Potoff, J. J.; Siepmann, J. I. Vapor–Liquid Equilibria of Mixtures Containing Alkanes, Carbon Dioxide, and Nitrogen *AIChE J.* **2001**, 47, 1676– 1682
6. Gelb, L. D.; Gubbins, K. E. Pore Size Distributions in Porous Glasses: A Computer Simulation Study *Langmuir* **1999**, 15, 305– 308
7. Gomez-Gualdrón, D. A.; Colon, Y. J.; Zhang, X.; Wang, T. C.; Chen, Y.-S.; Hupp, J. T.; Yildirim, T.; Farha, O. K.; Zhang, J.; Snurr, R. Q. Evaluating Topologically Diverse Metal-Organic Frameworks for Cryo-Adsorbed Hydrogen Storage *Energy Environ. Sci.* **2016**, 9, 3279– 3289
8. M.J. Frisch, G.W. Trucks, H.B. Schlegel, G.E. Scuseria, M.A. Robb, J.R. Cheeseman, G. Scalmani, V. Barone, B. Mennucci, G.A. Petersson, H. Nakatsuji, M. Caricato, X. Li, H.P. Hratchian, A.F. Izmaylov, J. Bloino, G. Zheng, J.L. Sonnenberg, M. Hada, M. Ehara, K. Toyota, R. Fukuda, J. Hasegawa, M. Ishida, T. Nakajima, Y. Honda, O. Kitao, H. Nakai, T. Vreven, J.A. Montgomery Jr., J.E. Peralta, F. Ogliaro, M.J. Bearpark, J. Heyd, E.N. Brothers, K.N. Kudin, V.N. Staroverov, R. Kobayashi, J. Normand, K. Raghavachari, A.P. Rendell, J.C. Burant, S.S. Iyengar, J. Tomasi, M. Cossi, N. Rega, N.J. Millam, M. Klene, J.E. Knox, J.B. Cross, V. Bakken, C. Adamo, J. Jaramillo, R. Gomperts, R.E. Stratmann, O. Yazyev, A.J. Austin, R. Cammi, C. Pomelli, J.W. Ochterski, R.L. Martin, K. Morokuma, V.G. Zakrzewski, G.A. Voth, P. Salvador, J.J. Dannenberg, S. Dapprich, A.D. Daniels, O. Farkas, J.B. Foresman, J.V. Ortiz, J. Cioslowski, D.J. Fox **Gaussian 09**, Gaussian, Inc., Wallingford, CT, USA (2009)
9. Y. Zhao & D.G. Truhlar (2006). "The M06 suite of density functionals for main group thermochemistry, thermochemical kinetics, noncovalent interactions, excited states, and transition elements: Two new functionals and systematic testing of four M06-class functionals and 12 other functionals". *Theor Chem Account.* **120**: 215– 241
10. Marvin was used for drawing and displaying chemical structures, Marvin 17.2.6, 2017 , ChemAxon (<http://www.chemaxon.com>)
11. C. R. Groom, I. J. Bruno, M. P. Lightfoot, and S. C. Ward, "The Cambridge structural database," *Acta Crystallogr. Sect. B Struct. Sci. Cryst. Eng. Mater.*, vol. 72, no. 2, pp. 171–179, 2016
